# Supplementary material for: Longitudinal Associations of Adherence to the Dietary World Cancer Research Fund/American Institute for Cancer Research (WCRF/AICR) and Dutch Healthy Diet (DHD) Recommendations with Plasma Kynurenines in Colorectal Cancer Survivors after Treatment
Source: Nutrients. 2022 Dec 3;14(23):5151. doi: 10.3390/nu14235151 (PMC9738623; doi:10.3390/nu14235151)
Supplement: Supplementary file 1 [file nutrients-14-05151-s001.zip › Supplementary Tables NEW.pdf]

**Supplementary Table S1.** Confounder-adjusted overall longitudinal, intra-individual, and inter-individual associations ( $n = 247$ ) between the dietary WCRF/AICR recommendations and metabolites of the kynurenine pathway

|                                                      |                                                                              | Kynurenic acid<br>(nmol/L)                                 | Picolinic acid<br>(nmol/L)                                 | Tryptophan<br>( $\mu$ mol/L)                              | Kynurenine<br>( $\mu$ mol/L)                             | Xanthurenic<br>acid (nmol/L)                                 | Anthranilic acid<br>(nmol/L)                                 | 3-Hydroxy-<br>anthranilic acid<br>(nmol/L)                 | 3-Hydroxy-<br>kynurenine<br>(nmol/L)                         | Quinolinic acid<br>(nmol/L)                                |
|------------------------------------------------------|------------------------------------------------------------------------------|------------------------------------------------------------|------------------------------------------------------------|-----------------------------------------------------------|----------------------------------------------------------|--------------------------------------------------------------|--------------------------------------------------------------|------------------------------------------------------------|--------------------------------------------------------------|------------------------------------------------------------|
| Dietscore<br>WCRF/AICR<br>(0–5 points)               | Adjusted <sup>1,2,3</sup><br>Within <sup>1,4</sup><br>Between <sup>1,5</sup> | .03 (–.05, .11)<br>.02 (–.09, .12)<br>.05 (–.08, .17)      | .02 (–.09, .13)<br>–.06 (–.20, .07)<br>.17 (–.01, .36)     | –.01 (–.12, .11)<br>.00 (–.16, .15)<br>–.01 (–.19, .16)   | –.05 (–.13, .04)<br>–.07 (–.17, .04)<br>–.01 (–.16, .13) | .01 (–.10, .12)<br>.01 (–.13, .15)<br>.00 (–.17, .18)        | –.05 (–.16, .06)<br>.01 (–.15, .16)<br>–.10 (–.26, .06)      | .00 (–.11, .11)<br>–.01 (–.16, .13)<br>.02 (–.15, .19)     | –.04 (–.13, .08)<br>–.02 (–.15, .10)<br>.02 (–.14, .18)      | –.06 (–.15, .02)<br>–.08 (–.17, .02)<br>–.01 (–.19, .16)   |
| Dietscore<br>WCRF/AICR excl.<br>alcohol (0–4 points) | Adjusted <sup>1,2,3</sup><br>Within <sup>1,4</sup><br>Between <sup>1,5</sup> | .08 (–.01; .17)<br>.04 (–.07; .16)<br>.13 (–.01; .26)      | .09 (–.03; .21)<br>–.03 (–.18; .12)<br>.30* (–.10; .49)    | .13 (–.01; .28)<br>.12 (–.05; .29)<br>.13 (–.06; .32)     | –.05 (–.15; .04)<br>–.02 (–.15; .10)<br>–.10 (–.26; .53) | .13* (.02; .25)<br>.06 (–.09; .22)<br>.23* (.05; .42)        | –.03 (–.15; .09)<br>.05 (–.12; .22)<br>–.12 (–.29; .05)      | .02 (–.10; .14)<br>.01 (–.15; .17)<br>.03 (–.15; .22)      | –.03 (–.17; .10)<br>–.01 (–.15; .10)<br>–.08 (–.25; .10)     | –.12 (–.22; –.03)<br>–.11* (–.22; .00)<br>–.19 (–.37; .00) |
| Vegetable and fruit<br>(g/day)                       | Adjusted <sup>1,2,3</sup><br>Within <sup>1,4</sup><br>Between <sup>1,5</sup> | –.01 (–.08, .05)<br>.00 (–.09, .08)<br>–.02 (–.10, .07)    | –.06 (–.14, .02)<br>–.12* (–.23, –.01)<br>.01 (–.12, .14)  | .02 (–.07, .11)<br>.00 (–.12, .12)<br>.04 (–.08, .16)     | –.05 (–.12, .01)<br>–.05 (–.14, .03)<br>–.05 (–.15, .05) | –.03 (–.11, .05)<br>.00 (–.12, .11)<br>–.06 (–.18, .06)      | –.02 (–.13, .09)<br>–.01 (–.13, .12)<br>–.04 (–.15, .07)     | –.03 (–.12, .05)<br>–.05 (–.16, .07)<br>–.02 (–.14, .10)   | –.08* (–.16, –.01)<br>–.05 (–.15, .05)<br>–.13* (–.24, –.02) | –.01 (–.08, .05)<br>.01 (–.07, .08)<br>–.06 (–.18, .06)    |
| Dietary fibre (g/day)                                | Adjusted <sup>1,2,3</sup><br>Within <sup>1,4</sup><br>Between <sup>1,5</sup> | –.04 (–.11, .03)<br>.03 (–.07, .12)<br>–.08 (–.18, .01)    | –.05 (–.15, .05)<br>–.03 (–.16, .10)<br>–.07 (–.21, .07)   | .03 (–.08, .14)<br>.06 (–.08, .20)<br>.00 (–.13, .14)     | –.07 (–.15, .01)<br>–.07 (–.17, .04)<br>–.07 (–.18, .04) | –.05 (–.15, .05)<br>.07 (–.06, .20)<br>–.16* (–.29, –.04)    | –.12* (–.22, –.02)<br>–.07 (–.21, .07)<br>–.15* (–.27, –.03) | –.03 (–.14, .07)<br>.01 (–.13, .14)<br>–.07 (–.20, .06)    | –.04 (–.15, .08)<br>–.01 (–.13, .11)<br>–.07 (–.19, .05)     | –.07 (–.15, .00)<br>–.08 (–.17, .01)<br>–.05 (–.18, .08)   |
| Alcohol (g/day)                                      | Adjusted <sup>1,2,3</sup><br>Within <sup>1,4</sup><br>Between <sup>1,5</sup> | .12* (.03, .20)<br>.14 (–.01, .28)<br>.13* (.04, .21)      | .08 (–.02, .19)<br>.12 (–.07, .31)<br>.06 (–.06, .19)      | .14* (.02, .27)<br>.16 (–.05, .37)<br>.09 (–.03, .21)     | –.02 (–.11, .06)<br>–.02 (–.17, .13)<br>–.03 (–.13, .07) | .18* (.09, .28)<br>.15 (–.04, .35)<br>.20* (.08, .31)        | .05 (–.05, .14)<br>.07 (–.14, .28)<br>.04 (–.07, .15)        | –.02 (–.12, –.08)<br>–.07 (–.27, .13)<br>.00 (–.12, .12)   | –.03 (–.16, .10)<br>.01 (–.17, .19)<br>–.04 (–.16, .07)      | –.08 (–.16, .00)<br>–.01 (–.15, .12)<br>–.12* (–.24, .00)  |
| Ultra-processed<br>foods (%energy)                   | Adjusted <sup>1,2,3</sup><br>Within <sup>1,4</sup><br>Between <sup>1,5</sup> | –.05 (–.11, .00)<br>–.01 (–.05, .03)<br>–.06* (–.11, –.01) | –.05 (–.12, .03)<br>.02 (–.04, .08)<br>–.11* (–.18, –.04)  | –.04 (–.12, .04)<br>–.01 (–.07, .05)<br>–.05 (–.12, .03)  | .03 (–.03, .09)<br>.01 (–.03, .06)<br>.02 (–.03, .08)    | –.10* (–.17, –.02)<br>–.02 (–.08, .04)<br>–.11* (–.17, –.04) | .00 (–.08, .07)<br>–.02 (–.08, .04)<br>.01 (–.05, .08)       | –.04 (–.12, .04)<br>–.02 (–.08, .04)<br>–.03 (–.10, .04)   | .01 (–.06, .08)<br>.00 (–.05, .06)<br>.01 (–.05, .07)        | .06 (–.01, .13)<br>.03 (–.01, .07)<br>.06 (–.01, .13)      |
| Red meat<br>(g/week)                                 | Adjusted <sup>1,2,3</sup><br>Within <sup>1,4</sup><br>Between <sup>1,5</sup> | .02 (–.04, .08)<br>.03 (–.05, .11)<br>.00 (–.09, .10)      | .05 (–.04, .13)<br>.06 (–.04, .16)<br>.01 (–.13, .16)      | –.07 (–.15, .02)<br>–.06 (–.18, .05)<br>–.07 (–.21, .07)  | .01 (–.05, .08)<br>.01 (–.07, .09)<br>.01 (–.10, .13)    | .05 (–.03, .14)<br>.06 (–.04, .17)<br>.03 (–.11, .17)        | .09 (–.01, .19)<br>.12* (.01, .23)<br>.08 (–.04, .21)        | .00 (–.08, .09)<br>.04 (–.06, .15)<br>–.07 (–.21, .07)     | .09* (.00, .19)<br>.08 (–.02, .17)<br>.12, –.01, .25)        | .02 (–.05, .08)<br>.02 (–.05, .09)<br>.03 (–.11, .16)      |
| Processed meat<br>(g/week)                           | Adjusted <sup>1,2,3</sup><br>Within <sup>1,4</sup><br>Between <sup>1,5</sup> | –.03 (–.09, .03)<br>.00 (–.08, .08)<br>–.07 (–.16, .03)    | –.04 (–.13, .05)<br>–.06 (–.16, .04)<br>–.04 (–.18, .11)   | –.05 (–.14, .03)<br>.00 (–.11, .12)<br>–.14* (–.28, –.01) | .02 (–.04, .09)<br>.01 (–.07, .09)<br>.05 (–.07, .16)    | –.04 (–.12, .04)<br>–.01 (–.11, .10)<br>–.10 (–.23, .04)     | .05 (–.05, .15)<br>.05 (–.06, .17)<br>.09 (–.03, .22)        | –.09* (–.18, –.01)<br>–.08 (–.19, .02)<br>–.11 (–.24, .02) | .01 (–.06, .09)<br>–.09 (–.18, .00)<br>.19* (.07, .32)       | –.01 (–.08, .07)<br>–.05 (–.12, .02)<br>.13 (–.01, .26)    |
| Sugar-sweetened<br>drinks (g/day)                    | Adjusted <sup>1,2</sup><br>Within <sup>1,4</sup><br>Between <sup>1,5</sup>   | –.04 (–.09, .02)<br>–.02 (–.09, .05)<br>–.06 (–.14, .02)   | –.08 (–.15, .00)<br>–.03 (–.12, .07)<br>–.16* (–.28, –.04) | –.06 (–.14, .02)<br>.06 (–.16, .04)<br>–.06 (–.18, .06)   | .02 (–.04, .08)<br>–.04 (–.12, .03)<br>.13* (.03, .23)   | –.07 (–.14, .01)<br>.00 (–.10, .09)<br>–.16* (–.27, –.04)    | –.01 (–.09, .07)<br>–.11* (–.21, .00)<br>.09 (–.02, .20)     | –.02 (–.09, .06)<br>–.03 (–.13, .07)<br>.00 (–.11, .12)    | –.03 (–.10, .04)<br>–.04 (–.13, .05)<br>–.02 (–.13, .09)     | .03 (–.03, .09)<br>–.01 (–.08, .06)<br>.17* (.06, .29)     |

Abbreviations: WCRF/AICR, World Cancer Research Fund/American Institute for Cancer Research.

Both exposure and outcome variables are standardized.

Standard deviations of kynurenines are: 29 nmol/L for kynurenic acid; 15 nmol/L for picolinic acid; 12  $\mu$ mol/L for tryptophan; 0.5  $\mu$ mol/L for kynurenine; 8 nmol/L for xanthurenic acid; 7 nmol/L for anthranilic acid; 15 nmol/L for 3-hydroxyanthranilic acid; 27 for 3-hydroxykynurenine; and 366 nmol/L for quinolinic acid.

Standard deviations of dietary intake are: 1 point for dietscore WCRF/AICR, 128 g/day for vegetable and fruit; 6 g/day for fiber; 19 g/day for alcohol; 10% for ultra-processed foods; 301 g/week for red meat; 209 g/week for processed meat, and 132 g/day for sugar-sweetened drinks.

<sup>1</sup> Linear mixed models adjusted for age at enrollment (years), sex (male, female), renal function ( $\mu\text{mol/L}$ ), time since end treatment (weeks), chemotherapy (yes, no), comorbidities (0, 1,  $\geq 2$ ), stoma (yes, no), educational level (high, medium, low), BMI ( $\text{kg/m}^2$ ), total PA (hours/day), smoking status (current, former, never) and energy intake (kcal/week)

<sup>2</sup> The  $\beta$ -coefficients represent the overall longitudinal difference in kynurenine concentrations using linear mixed models, and can be interpreted as the amount of SD difference in kynurenine concentration/ratio according to 1SD difference in dietary score/intake

<sup>3</sup> A random slope was added to the model for dietscore WCRF/AICR with HK; for dietscore WCRF/AICR excl. alcohol with Trp, and HK; for vegetable and fruit with KA, and AA; for dietary fiber with HK, KA, and QA; for alcohol with Trp, HK, KA, and QA; for ultra-processed foods with QA; for red meat intake with HK, and AA; and for processed meat intake with AA, Pic, and QA

<sup>4</sup> The  $\beta$ -coefficients represent the change in kynurenine concentration over time within individuals using a hybrid model within linear mixed models

<sup>5</sup> The  $\beta$ -coefficients represent the difference in kynurenine concentration between individuals using a hybrid model within linear mixed models

\* Indicates a statistically significant association

**Supplementary Table S2.** Confounder-adjusted overall longitudinal, intra-individual, and inter-individual associations ( $n = 247$ ) between the dietary WCRF/AICR recommendations and relevant kynurenine ratios

|                                                |                           | KA/QA              | HAA/HK             | KTR                | HKr                | Neopterin (nmol/L) |
|------------------------------------------------|---------------------------|--------------------|--------------------|--------------------|--------------------|--------------------|
| Dietscore WCRF/AICR (0–5 points)               | Adjusted <sup>1,2,3</sup> | .09 (.00, .19)     | –.03 (–.15, .08)   | –.08 (–.19, .03)   | –.07 (–.19, .05)   | .03 (–.09, .14)    |
|                                                | Within <sup>1,4</sup>     | .09 (–.03, .21)    | –.09 (–.23, .04)   | –.11 (–.22, .00)   | –.04 (–.17, .08)   | .02 (–.09, .14)    |
|                                                | Between <sup>1,5</sup>    | .11 (–.06, .28)    | .03 (–.13, .20)    | .01 (–.15, .16)    | –.05 (–.21, .11)   | .02 (–.15, .19)    |
| Dietscore WCRF/AICR excl. alcohol (0–4 points) | Adjusted <sup>1,2,3</sup> | .20* (.10; .31)    | .01 (–.13; .14)    | –.16* (–.28; –.04) | –.12 (–.26; .02)   | –.06 (–.18, .05)   |
|                                                | Within <sup>1,4</sup>     | .12 (–.01; .25)    | –.09 (–.24; .06)   | –.18* (–.30; –.05) | –.06 (–.20; .08)   | .00 (–.13, .13)    |
|                                                | Between <sup>1,5</sup>    | .36* (.17; .54)    | .11 (–.07; .28)    | –.18* (–.35; –.02) | –.23* (–.41; –.06) | –.21* (–.39, –.03) |
| Vegetable and fruit (g/day)                    | Adjusted <sup>1,2,3</sup> | .01 (–.06, .09)    | .06 (–.01, .14)    | –.04 (–.14, .06)   | –.08* (–.15, –.01) | .03 (–.05, .12)    |
|                                                | Within <sup>1,4</sup>     | –.03 (–.13, .06)   | .04 (–.07, .15)    | –.01 (–.10, .08)   | –.03 (–.14, .07)   | .05 (–.04, .14)    |
|                                                | Between <sup>1,5</sup>    | .09 (–.03, .21)    | .09 (–.02, .21)    | –.07 (–.18, .03)   | –.16* (–.27, –.04) | .03 (–.09, .14)    |
| Dietary fiber (g/day)                          | Adjusted <sup>1,2,3</sup> | .05 (–.04, .14)    | .02 (–.08, .12)    | –.06 (–.14, .02)   | –.01 (–.12, .09)   | –.02 (–.11, .07)   |
|                                                | Within <sup>1,4</sup>     | .08 (–.03, .19)    | –.02 (–.14, .11)   | –.05 (–.16, .05)   | .01 (–.11, .13)    | –.01 (–.12, .10)   |
|                                                | Between <sup>1,5</sup>    | .01 (–.12, .13)    | .05 (–.07, .18)    | –.07 (–.18, .05)   | –.04 (–.16, .08)   | –.03 (–.16, .10)   |
| Alcohol (g/day)                                | Adjusted <sup>1,2,3</sup> | .22* (.12, .31)    | .04 (–.06, .14)    | –.25* (–.40, –.11) | –.14* (–.27, –.01) | –.14* (–.25, –.04) |
|                                                | Within <sup>1,4</sup>     | .13 (–.03, .30)    | .01 (–.18, .20)    | –.13 (–.29, .02)   | –.05 (–.23, .12)   | –.07 (–.23, .09)   |
|                                                | Between <sup>1,5</sup>    | .25* (.14, .37)    | .05 (–.06, .16)    | –.09 (–.20, .02)   | –.12* (–.23, –.01) | –.15* (–.26, –.03) |
| Ultra-processed foods (%energy)                | Adjusted <sup>1,2,3</sup> | –.11* (–.18, –.04) | .01 (–.07, .09)    | .06 (–.03, .14)    | .06 (–.03, .14)    | .04 (–.02, .11)    |
|                                                | Within <sup>1,4</sup>     | –.03 (–.08, .02)   | .03 (–.03, .08)    | .05* (.00, .09)    | .01 (–.04, .07)    | .01 (–.04, .06)    |
|                                                | Between <sup>1,5</sup>    | –.14* (–.21, –.07) | –.03 (–.10, .04)   | .05 (–.01, .11)    | .07* (.01, .14)    | .06 (–.01, .13)    |
| Red meat (g/week)                              | Adjusted <sup>1,2,3</sup> | .00 (–.08, .07)    | –.14* (–.22, –.06) | .07 (–.02, .16)    | .09* (.01, .17)    | .06 (–.02, .14)    |
|                                                | Within <sup>1,4</sup>     | .01 (–.08, .10)    | –.13* (–.22, –.03) | .06 (–.02, .14)    | .06 (–.04, .15)    | .08 (–.01, .16)    |
|                                                | Between <sup>1,5</sup>    | –.04 (–.17, .10)   | –.17* (–.30, –.04) | .08 (–.04, .21)    | .15* (.02, .28)    | .04 (–.10, .17)    |
| Processed meat (g/week)                        | Adjusted <sup>1,2,3</sup> | –.04 (–.12, .03)   | –.02 (–.14, .10)   | .02 (–.07, .11)    | .07 (–.01, .14)    | .05 (–.03, .13)    |
|                                                | Within <sup>1,4</sup>     | .01 (–.08, .10)    | .01 (–.09, .10)    | –.01 (–.09, .07)   | –.05 (–.14, .05)   | .01 (–.07, .10)    |
|                                                | Between <sup>1,5</sup>    | –.16* (–.29, –.03) | –.25* (–.37, –.12) | .17* (.05, .29)    | .28* (.16, .40)    | .15 (.02, .28)     |
| Sugar-sweetened drinks (g/day)                 | Adjusted <sup>1,2,3</sup> | –.10* (–.17, –.03) | .06 (–.07, .19)    | .08 (–.01, .18)    | .04 (–.02, .10)    | .04 (–.05, .12)    |
|                                                | Within <sup>1,4</sup>     | –.04 (–.13, .04)   | .05 (–.04, .15)    | .04 (–.03, .12)    | .00 (–.09, .08)    | –.03 (–.11, .05)   |
|                                                | Between <sup>1,5</sup>    | –.21* (–.32, –.10) | –.05 (–.16, .06)   | .14* (.04, .25)    | .05 (–.06, .16)    | .20* (.09, .31)    |

Abbreviations: WCRF/AICR, World Cancer Research Fund/American Institute for Cancer Research; KA/QA, kynurenic-acid-to-quinolinic-acid ratio; HAA/HK, 3-hydroxyanthranilic-acid-to-3-hydroxykynurenine ratio; KTR, kynurenine-to-tryptophan ratio; and HKr, hydroxykynurenine ratio. Both exposure and outcome variables are standardized.

Standard deviations of ratios are: 0.05 for KA/QA, 0.4 for HAA/HK; 10 for KTR; 0.2 for HKr; and 11 nmol/L for neopterin.

Standard deviations of dietary intake are: 1 point for dietscore WCRF/AICR, 128 g/day for vegetable and fruit; 6 g/day for fiber; 19 g/day for alcohol; 10% for ultra-processed foods; 301 g/week for red meat; 209 g/week for processed meat, and 132 g/day for sugar-sweetened drinks.

<sup>1</sup> Linear mixed models adjusted for age at enrollment (years), sex (male, female), renal function ( $\mu\text{mol/L}$ ), time since end treatment (weeks), chemotherapy (yes, no), comorbidities (0, 1,  $\geq 2$ ), stoma (yes, no), educational level (high, medium, low), BMI ( $\text{kg/m}^2$ ), total PA (hours/day), smoking status (current, former, never) and energy intake (kcal/week)

<sup>2</sup> The  $\beta$ -coefficients represent the overall longitudinal difference in kynurenine concentrations using linear mixed models, and can be interpreted as the amount of SD difference in kynurenine concentration/ratio according to 1SD difference in dietary score/intake

<sup>3</sup> A random slope was added to the model for dietscore WCRF/AICR with KTR, HKr, HAA/HK, and Neopt; for dietscore WCRF/AICR excl alcohol with KTR, HKr, and HAA/HK; for vegetable and fruit with KTR, HKr, and Neopt; for dietary fiber with HKr; for alcohol with KTR, HKr, and Neopt; for ultra-processed foods with KTR, HKr, and HAA/HK; for red meat with KTR, and Neopt; for processed meat with KTR, HAA/HK, and Neopt; and for sugar-sweetened drink intake with KTR, HKr, HAA/HK, and Neopt.

<sup>4</sup> The  $\beta$ -coefficients represent the change in kynurenine ratios over time within individuals using a hybrid model within linear mixed models

<sup>5</sup> The  $\beta$ -coefficients represent the difference in kynurenine ratios between individuals using a hybrid model within linear mixed models

\* Indicates a statistically significant association

**Supplementary Table S3.** Confounder-adjusted overall longitudinal, intra-individual, and inter-individual associations ( $n = 247$ ) between the DHD recommendations and metabolites of the kynurenine pathway

|                                                    |                           | Kynurenic acid<br>(nmol/L) | Picolinic acid<br>(nmol/L) | Tryptophan<br>( $\mu$ mol/L) | Kynurenine<br>( $\mu$ mol/L) | Xanthurenic acid<br>(nmol/L) | Anthranilic acid<br>(nmol/L) | 3-Hydroxy-<br>anthranilic acid<br>(nmol/L) | 3-Hydroxy-<br>Kynurenine<br>(nmol/L) | Quinolinic acid<br>(nmol/L) |
|----------------------------------------------------|---------------------------|----------------------------|----------------------------|------------------------------|------------------------------|------------------------------|------------------------------|--------------------------------------------|--------------------------------------|-----------------------------|
| Total DHD score<br>(0–130 points)                  | Adjusted <sup>1,2</sup>   | -.02 (-.08; .04)           | -.02 (-.10; .07)           | .02 (-.07; .11)              | -.06 (-.13; .01)             | -.05 (-.14; .03)             | -.02 (-.11; .06)             | .01 (-.08; .09)                            | -.08 (-.15; .00)                     | -.04 (-.11; .02)            |
|                                                    | Within <sup>1,4</sup>     | -.02 (-.10; .06)           | -.07 (-.18; .03)           | .00 (-.12; .12)              | -.07 (-.16; .01)             | -.06 (-.17; .05)             | .02 (-.09; .14)              | -.02 (-.13; .09)                           | -.07 (-.17; .03)                     | -.04 (-.11; .04)            |
|                                                    | Between <sup>1,5</sup>    | -.02 (-.11; .08)           | .07 (-.07; .21)            | .04 (-.09; .18)              | -.04 (-.15; .07)             | -.08 (-.21; .05)             | -.07 (-.19; .05)             | .04 (-.09; .17)                            | -.09 (-.21; .04)                     | -.05 (-.18; .08)            |
| Total DHD score<br>excl. alcohol<br>(0–120 points) | Adjusted <sup>1,2</sup>   | .00 (-.06; .06)            | .00 (-.09; .08)            | .05 (-.04; .13)              | -.07* (-.14; -.01)           | -.02 (-.11; .06)             | -.01 (-.10; .07)             | .01 (-.08; .09)                            | -.08* (-.16; -.01)                   | -.06 (-.13; .00)            |
|                                                    | Within <sup>1,4</sup>     | -.01 (-.09; .07)           | -.06 (-.16; .04)           | .02 (-.10; .14)              | -.08 (-.16; .01)             | -.04 (-.15; .06)             | .04 (-.07; .16)              | -.03 (-.14; .08)                           | -.07 (-.16; .03)                     | -.05 (-.12; .03)            |
|                                                    | Between <sup>1,5</sup>    | .02 (-.07; .11)            | .10 (-.04; .24)            | .08 (-.05; .21)              | -.07 (-.18; .04)             | .01 (-.12; .13)              | -.07 (-.19; .04)             | .05 (-.08; .18)                            | -.10 (-.22; .02)                     | -.10 (-.23; .03)            |
| Vegetables<br>(g/day)                              | Adjusted <sup>1,2,3</sup> | .04 (-.02; .10)            | -.03 (-.11; .06)           | .02 (-.07; .10)              | -.03 (-.09; .03)             | .02 (-.06; .11)              | -.05 (-.13; .03)             | -.01 (-.09; .07)                           | -.01 (-.11; .10)                     | .00 (-.06; .07)             |
|                                                    | Within <sup>1,4</sup>     | .05 (-.03; .12)            | -.05 (-.15; .04)           | .00 (-.11; .11)              | -.01 (-.08; .07)             | .01 (-.09; .11)              | -.06 (-.17; .05)             | .00 (-.10; .11)                            | .00 (-.09; .09)                      | .05 (-.02; .12)             |
|                                                    | Between <sup>1,5</sup>    | .06 (-.03; .15)            | .06 (-.07; .20)            | .04 (-.09; .17)              | -.07 (-.18; .03)             | .08 (-.05; .20)              | -.03 (-.15; .08)             | -.03 (-.15; .10)                           | -.10 (-.21; .02)                     | -.15* (-.28; -.02)          |
| Fruit (g/day)                                      | Adjusted <sup>1,2,3</sup> | -.06 (-.12; .00)           | -.07 (-.16; .03)           | .01 (-.07; .10)              | -.04 (-.11; .02)             | -.07 (-.15; .01)             | -.01 (-.12; .09)             | -.04 (-.12; .05)                           | -.07 (-.16; .01)                     | -.02 (-.09; .04)            |
|                                                    | Within <sup>1,4</sup>     | -.05 (-.13; .03)           | -.10 (-.20; .01)           | -.01 (-.12; .11)             | -.07 (-.15; .02)             | -.03 (-.13; .08)             | .05 (-.07; .17)              | -.06 (-.17; .05)                           | -.07 (-.17; .03)                     | -.04 (-.12; .03)            |
|                                                    | Between <sup>1,5</sup>    | -.07 (-.15; .02)           | -.03 (-.15; .10)           | .03 (-.09; .15)              | -.01 (-.11; .09)             | -.13* (-.24; -.01)           | -.03 (-.14; .08)             | -.01 (-.13; .11)                           | -.10 (-.21; .01)                     | .03 (-.09; .14)             |
| Legumes (g/day)                                    | Adjusted <sup>1,2</sup>   | .01 (-.03; .06)            | .03 (-.03; .09)            | .05 (-.02; .11)              | -.03 (-.07; .02)             | .02 (-.04; .08)              | .13 (-.12; .38)              | .02 (-.04; .08)                            | -.03 (-.08; .03)                     | .00 (-.04; .04)             |
|                                                    | Within <sup>1,4</sup>     | .01 (-.04; .06)            | .04 (-.02; .10)            | .04 (-.03; .11)              | -.03 (-.08; .02)             | .03 (-.03; .10)              | .01 (-.06; .08)              | .02 (-.04; .09)                            | -.03 (-.09; .03)                     | .00 (-.04; .04)             |
|                                                    | Between <sup>1,5</sup>    | .03 (-.07; .14)            | -.02 (-.17; .13)           | .06 (-.09; .20)              | -.04 (-.16; .08)             | -.02 (-.18; .11)             | -.06 (-.19; .08)             | .02 (-.12; .16)                            | -.01 (-.15; .12)                     | -.01 (-.15; .14)            |
| Whole grain<br>(g/day)                             | Adjusted <sup>1,2,3</sup> | -.01 (-.07; .05)           | .02 (-.07; .11)            | .01 (-.08; .10)              | .00 (-.06; .07)              | -.03 (-.11; .06)             | -.08* (-.16; .00)            | .02 (-.07; .10)                            | .07 (-.02; .17)                      | -.03 (-.10; .03)            |
|                                                    | Within <sup>1,4</sup>     | .00 (-.09; .09)            | .02 (-.10; .14)            | .04 (-.09; .17)              | .02 (-.08; .11)              | -.02 (-.14; .10)             | .00 (-.13; .14)              | .05 (-.08; .17)                            | .08 (-.03; .19)                      | -.05 (-.14; .03)            |
|                                                    | Between <sup>1,5</sup>    | -.02 (-.10; .07)           | .02 (-.10; .15)            | -.01 (-.13; .11)             | -.01 (-.11; .09)             | -.04 (-.15; .08)             | -.12* (-.22; -.01)           | -.01 (-.13; .11)                           | .05 (-.06; .17)                      | .01 (-.11; .13)             |
| Nuts (g/day)                                       | Adjusted <sup>1,2,3</sup> | .02 (-.03; .07)            | .01 (-.06; .08)            | .03 (-.03; .09)              | -.03 (-.08; .03)             | .01 (-.06; .08)              | .00 (-.07; .08)              | -.03 (-.09; .03)                           | -.05 (-.11; .01)                     | -.04 (-.09; .01)            |
|                                                    | Within <sup>1,4</sup>     | .03 (-.03; .09)            | .02 (-.06; .10)            | .03 (-.06; .12)              | -.01 (-.08; .05)             | .03 (-.05; .12)              | .05 (-.04; .14)              | .01 (-.07; .10)                            | -.02 (-.09; .05)                     | -.03 (-.09; .02)            |
|                                                    | Between <sup>1,5</sup>    | .01 (-.09; .10)            | -.03 (-.17; .11)           | .03 (-.10; .16)              | -.07 (-.18; .03)             | -.04 (-.16; .09)             | -.07 (-.19; .04)             | -.07 (-.19; .06)                           | -.13* (-.25; -.02)                   | -.08 (-.21; .05)            |
| Lean fish (g/day)                                  | Adjusted <sup>1,2,3</sup> | .01 (-.04; .07)            | .03 (-.04; .10)            | .01 (-.07; .09)              | .00 (-.05; .06)              | .07 (-.01; .14)              | -.06 (-.15; .03)             | .04 (-.03; .11)                            | .04 (-.02; .11)                      | -.03 (-.08; .02)            |
|                                                    | Within <sup>1,4</sup>     | .04 (-.02; .10)            | .04 (-.04; .12)            | .04 (-.05; .13)              | .04 (-.03; .10)              | .08 (.00; .16)               | -.06 (-.15; .03)             | .07 (-.02; .15)                            | .06 (-.01; .14)                      | -.01 (-.07; .05)            |
|                                                    | Between <sup>1,5</sup>    | -.05 (-.14; .05)           | .00 (-.14; .14)            | -.05 (-.19; .09)             | -.09 (-.20; .02)             | .02 (-.11; .16)              | -.10 (-.22; .03)             | -.03 (-.16; .11)                           | -.01 (-.14; .11)                     | -.08 (-.22; .06)            |
| Fatty fish (g/day)                                 | Adjusted <sup>1,2</sup>   | .02 (-.02; .07)            | .05 (-.01; .11)            | .03 (-.04; .09)              | -.03 (-.08; .02)             | .04 (-.01; .10)              | .02 (-.04; .08)              | .07 (-.02; .16)                            | .02 (-.02; .07)                      | -.01 (-.05; .04)            |
|                                                    | Within <sup>1,4</sup>     | .03 (-.02; .08)            | .03 (-.03; .09)            | .02 (-.05; .10)              | -.01 (-.06; .04)             | .04 (-.03; .11)              | .04 (-.03; .11)              | .07 (.00; .13)                             | .03 (-.03; .09)                      | .01 (-.04; .05)             |
|                                                    | Between <sup>1,5</sup>    | -.01 (-.11; .10)           | .18 (.03; .33)*            | .03 (-.11; .18)              | -.15* (-.27; -.03)           | .07 (-.08; .21)              | -.05 (-.18; .08)             | .01 (-.14; .15)                            | -.02 (-.15; .12)                     | -.15* (-.29; .00)           |
| Tea (g/day)                                        | Adjusted <sup>1,2,3</sup> | -.02 (-.09; .05)           | -.03 (-.13; .07)           | -.05 (-.15; .05)             | -.01 (-.09; .07)             | -.07 (-.16; .03)             | -.03 (-.11; .05)             | -.09 (-.18; .01)                           | .01 (-.08; .09)                      | .00 (-.08; .09)             |
|                                                    | Within <sup>1,4</sup>     | -.07 (-.20; .05)           | -.05 (-.21; .11)           | .06 (-.12; .50)              | .05 (-.08; .18)              | -.13 (-.30; .03)             | .02 (-.16; .19)              | -.07 (-.24; .10)                           | .02 (-.13; .17)                      | .01 (-.11; .12)             |
|                                                    | Between <sup>1,5</sup>    | .01 (-.07; .10)            | -.02 (-.15; .10)           | -.10 (-.22; .02)             | -.04 (-.14; .06)             | -.03 (-.15; .08)             | -.05 (-.16; .06)             | -.10 (-.21; .02)                           | -.00 (-.11; .11)                     | .00 (-.12; .12)             |
| Alcohol (g/day)                                    | Adjusted <sup>1,2,3</sup> | .12 (.03; .20)             | .08 (-.02; .19)            | .14 (.02; .27)*              | -.02 (-.11; .06)             | .18* (.09; .28)              | .05 (-.05; .14)              | -.02 (-.12; .08)                           | -.03 (-.16; .10)                     | -.08 (-.16; .00)            |
|                                                    | Within <sup>1,4</sup>     | .14 (-.01; .28)            | .12 (-.07; .31)            | .16 (-.05; .37)              | -.02 (-.17; .13)             | .15 (-.04; .35)              | .07 (-.14; .28)              | -.07 (-.27; .13)                           | .01 (-.17; .18)                      | -.01 (-.15; .12)            |
|                                                    | Between <sup>1,5</sup>    | .13 (.04; .21)             | .06 (-.06; .19)            | .09 (-.03; .21)              | -.03 (-.13; .07)             | .20* (.08; .31)              | .04 (-.07; .15)              | .00 (-.12; .12)                            | -.04 (-.16; .07)                     | -.12 (-.24; .00)            |
| Dairy (g/day)                                      | Adjusted <sup>1,2,3</sup> | -.01 (-.07; .05)           | -.04 (-.12; .05)           | .02 (-.07; .10)              | .01 (-.06; .08)              | -.02 (-.11; .06)             | -.03 (-.11; .05)             | .05 (-.03; .13)                            | -.04 (-.13; .04)                     | -.02 (-.08; .05)            |

|                                              |                           |                  |                   |                    |                  |                    |                    |                    |                  |                  |
|----------------------------------------------|---------------------------|------------------|-------------------|--------------------|------------------|--------------------|--------------------|--------------------|------------------|------------------|
|                                              | Within <sup>1,4</sup>     | -.02 (-.11; .07) | -.05 (-.16; .07)  | .00 (-.13; .12)    | -.04 (-.13; .05) | .01 (-.11; .12)    | -.15* (-.27; -.02) | -.01 (-.13; .12)   | -.06 (-.17; .04) | -.06 (-.14; .02) |
|                                              | Between <sup>1,5</sup>    | .00 (-.08; .08)  | -.03 (-.15; .09)  | .04 (-.08; .15)    | .06 (-.03; .15)  | -.02 (-.14; .09)   | .04 (-.06; .14)    | .10 (-.01; .21)    | -.01 (-.11; .10) | .07 (-.05; .18)  |
| Cheese (g/day)                               | Adjusted <sup>1,2</sup>   | .07* (.01; .13)  | .08 (-.01; .16)   | .08 (.00; .17)     | .04 (-.03; .11)  | .15* (.07; .23)    | -.01 (-.10; .07)   | .06 (-.02; .14)    | .02 (-.06; .09)  | -.01 (-.10; .07) |
|                                              | Within <sup>1,4</sup>     | .04 (-.03; .12)  | .03 (-.07; .13)   | .14* (.03; .25)    | .06 (-.02; .14)  | .13* (.03; .23)    | .03 (-.08; .14)    | .07 (-.03; .18)    | .02 (-.07; .11)  | .01 (-.06; .09)  |
|                                              | Between <sup>1,5</sup>    | .11* (.02; .20)  | .17* (.03; .31)   | .05 (-.08; .18)    | .00 (-.11; .11)  | .17* (.05; .30)    | -.07 (-.18; .05)   | .04 (-.09; .17)    | .02 (-.10; .14)  | -.13 (-.26; .00) |
| Soft fats (g/day)                            | Adjusted <sup>1,2,3</sup> | -.01 (-.07; .05) | -.01 (-.09; .07)  | -.01 (-.10; .07)   | -.03 (-.09; .04) | -.04 (-.12; .04)   | -.05 (-.13; .02)   | -.06 (-.14; .03)   | -.01 (-.11; .08) | -.05 (-.12; .01) |
|                                              | Within <sup>1,4</sup>     | .01 (-.08; .09)  | .03 (-.08; .14)   | .01 (-.12; .13)    | -.03 (-.12; .06) | -.02 (-.13; .10)   | -.02 (-.15; .10)   | -.02 (-.13; .10)   | -.08 (-.18; .03) | -.06 (-.14; .02) |
|                                              | Between <sup>1,5</sup>    | -.03 (-.11; .05) | -.06 (-.18; .06)  | -.03 (-.14; .09)   | -.03 (-.12; .07) | -.07 (-.18; .05)   | -.07 (-.18; .03)   | -.09 (-.20; .02)   | .04 (-.07; .14)  | -.03 (-.15; .08) |
| Hard fats (g/day)                            | Adjusted <sup>1,2</sup>   | .00 (-.06; .06)  | .00 (-.09; .08)   | .02 (-.07; .10)    | .03 (-.03; .10)  | .02 (-.06; .10)    | .02 (-.07; .10)    | .04 (-.04; .13)    | .01 (-.07; .08)  | .04 (-.02; .10)  |
|                                              | Within <sup>1,4</sup>     | .03 (-.04; .11)  | -.01 (-.11; .10)  | .06 (-.06; .18)    | .03 (-.05; .12)  | .06 (-.05; .17)    | .04 (-.07; .16)    | .05 (-.06; .16)    | .04 (-.06; .13)  | .05 (-.02; .13)  |
|                                              | Between <sup>1,5</sup>    | -.05 (-.14; .04) | .00 (-.11; .10)   | -.03 (-.16; .09)   | .03 (-.07; .13)  | -.04 (-.16; .08)   | -.01 (-.12; .10)   | .03 (-.09; .15)    | -.04 (-.15; .08) | .00 (-.12; .12)  |
| Refined grain                                | Adjusted <sup>1,2,3</sup> | .01 (-.04; .07)  | -.03 (-.11; .05)  | -.09* (-.17; -.01) | -.04 (-.10; .02) | -.01 (-.09; .07)   | -.03 (-.10; .05)   | -.05 (-.13; .03)   | .00 (-.07; .07)  | -.01 (-.08; .07) |
|                                              | Within <sup>1,4</sup>     | .03 (-.04; .10)  | .00 (-.09; .09)   | -.12* (-.22; -.02) | -.04 (-.12; .03) | .02 (-.07; .12)    | .00 (-.10; .10)    | .01 (-.08; .11)    | .01 (-.07; .10)  | .02 (-.04; .09)  |
|                                              | Between <sup>1,5</sup>    | -.02 (-.11; .07) | -.09 (-.23; .05)  | -.05 (-.18; .08)   | -.03 (-.14; .08) | -.08 (-.20; .05)   | -.06 (-.18; .06)   | -.15* (-.28; -.03) | -.02 (-.14; .10) | -.08 (-.21; .05) |
| Red meat (g/day)                             | Adjusted <sup>1,2</sup>   | .04 (-.01; .09)  | .08* (.01; .15)   | .03 (-.06; .12)    | .01 (-.04; .07)  | .11* (.04; .18)    | .03 (-.05; .10)    | .07 (-.01; .14)    | .04 (-.02; .10)  | .00 (-.05; .05)  |
|                                              | Within <sup>1,4</sup>     | .05 (-.01; .10)  | .08* (.00; .16)   | .01 (-.08; .09)    | .01 (-.05; .08)  | .11* (.03; .19)    | .05 (-.04; .13)    | .10* (.02; .18)    | .06 (-.01; .14)  | .02 (-.03; .08)  |
|                                              | Between <sup>1,5</sup>    | .03 (-.07; .13)  | .08 (-.07; .23)   | .08 (-.07; .22)    | .00 (-.11; .12)  | .10 (-.04; .24)    | -.01 (-.14; .12)   | -.03 (-.17; .11)   | -.03 (-.16; .10) | -.08 (-.22; .06) |
| Processed meat (g/day)                       | Adjusted <sup>1,2,3</sup> | -.01 (-.08; .06) | -.03 (-.13; .06)  | -.07 (-.16; .02)   | .01 (-.06; .08)  | -.03 (-.12; .05)   | .05 (-.06; .15)    | -.06 (-.15; .03)   | .07 (-.01; .14)  | .01 (-.05; .08)  |
|                                              | Within <sup>1,4</sup>     | .01 (-.07; .09)  | -.02 (-.12; .09)  | -.04 (-.15; .08)   | .02 (-.06; .11)  | -.04 (-.14; .07)   | .09 (-.03; .20)    | -.04 (-.15; .07)   | .03 (-.06; .13)  | .01 (-.06; .08)  |
|                                              | Between <sup>1,5</sup>    | -.03 (-.13; .07) | -.03 (-.18; .12)  | -.13 (-.27; .01)   | -.02 (-.14; .10) | -.03 (-.17; .11)   | .06 (-.06; .19)    | -.09 (-.23; .04)   | .13 (.00; .26)   | .03 (-.11; .17)  |
| Sweetened beverages and fruit juices (g/day) | Adjusted <sup>1,2,3</sup> | -.04 (-.09; .02) | -.06 (-.13; .01)  | -.09* (-.17; -.02) | .02 (-.04; .07)  | -.06 (-.14; .01)   | .00 (-.07; .08)    | -.04 (-.11; .04)   | -.01 (-.08; .05) | .03 (-.03; .08)  |
|                                              | Within <sup>1,4</sup>     | -.03 (-.09; .04) | -.02 (-.11; .06)  | -.11* (-.21; -.01) | -.04 (-.11; .03) | -.02 (-.11; .07)   | -.08 (-.18; .02)   | -.05 (-.14; .04)   | -.02 (-.10; .06) | .00 (-.06; .06)  |
|                                              | Between <sup>1,5</sup>    | -.05 (-.14; .03) | -.15 (-.27; -.02) | -.06 (-.19; .06)   | .13* (.03; .23)  | -.14* (-.26; -.03) | .10 (.00; .21)     | -.02 (-.14; .09)   | -.01 (-.12; .10) | .14* (.02; .25)  |

Abbreviations: DHD, Dutch Healthy Diet score.

Both exposure and outcome variables are standardized.

Standard deviations of kynurenines are: 29 nmol/L for kynurenic acid; 15 nmol/L for picolinic acid; 12 µmol/L for tryptophan; 0.5 µmol/L for kynurenine; 8 nmol/L for xanthurenic acid; 7 nmol/L for anthranilic acid; 15 nmol/L for 3-hydroxyanthranilic acid; 27 for 3-hydroxykynurenine; and 366 nmol/L for quinolinic acid.

Standard deviations of dietary intake are: 15 points for DHD score; 71 g/day for vegetables; 90 g/day for fruit; 10 g/day for legumes; 63 g/day for whole grain; 7 g/day for nuts; 16 g/day for lean fish; 15 g/day for fatty fish; 264 g/day for tea; 19 g/day for alcohol; 143 g/day for dairy; 21 g/day for cheese; 14 g/day for soft fats; 12 g/day for hard fats; 51 g/day for refined grain; 27 g/day for red meat; 33 g/day for processed meat; and 115 g/day for sweetened beverages and fruit juices.

<sup>1</sup> Linear mixed models adjusted for age at enrollment (years), sex (male, female), renal function (µmol/L), time since end treatment (weeks), chemotherapy (yes, no), comorbidities (0, 1, ≥2), stoma (yes, no), educational level (high, medium, low), BMI (kg/m<sup>2</sup>), total PA (hours/day), smoking status (current, former, never) and energy intake (kcal/week)

<sup>2</sup> The β-coefficients represent the overall longitudinal difference in kynurenine concentrations using linear mixed models, and can be interpreted as the amount of SD difference in kynurenine concentration/ratio according to 1SD difference in dietary score/intake

<sup>3</sup> A random slope was added to the model for DHD score with XA; for vegetables with HK, KA, XA, and Pic; for fruit with HK, AA, and Pic; for legumes with AA; for whole grain with HK, AA, and QA; for nuts with Trp, and HAA; for lean fish with AA, and QA; for fatty fish with HAA; for tea with AA; for alcohol with Trp, HK, KA, and QA; for dairy with HK, and XA; for cheese with Trp, and QA; for soft fats with HK, and AA; for refined grain with AA, and QA; for red meat with Trp, and QA; and for processed meat with Trp, KA, AA, and Pic

<sup>4</sup> The  $\beta$ -coefficients represent the change in kynurenine concentration over time within individuals using a hybrid model within linear mixed models

<sup>5</sup> The  $\beta$ -coefficients represent the difference in kynurenine concentration between individuals using a hybrid model within linear mixed models

\* Indicates a statistically significant association

**Supplementary Table S4.** Confounder-adjusted overall longitudinal, intra-individual, and inter-individual associations ( $n = 247$ ) between the DHD recommendations and relevant kynurenine ratios

|                                                    |                           | KA/QA              | HAA/HK             | KTR                | HKr                | Neopt<br>(nmol/L)  |
|----------------------------------------------------|---------------------------|--------------------|--------------------|--------------------|--------------------|--------------------|
| Total DHD score<br>(0–130 points)                  | Adjusted <sup>1,2</sup>   | .03 (–.05; .10)    | .11* (.03; .19)    | –.08* (–.15; –.01) | –.08* (–.16; –.01) | –.03 (–.10; .05)   |
|                                                    | Within <sup>1,4</sup>     | .02 (–.07; .11)    | .10 (.00; .21)     | –.08 (–.17; .01)   | –.07 (–.16; .03)   | –.03 (–.12; .06)   |
|                                                    | Between <sup>1,5</sup>    | .04 (–.09; .18)    | .12 (–.01; .24)    | –.08 (–.20; .04)   | –.11 (–.24; .01)   | –.02 (–.15; .10)   |
| Total DHD score<br>excl. alcohol<br>(0–120 points) | Adjusted <sup>1,2</sup>   | .07 (–.01; .14)    | .11* (.03; .19)    | –.11* (–.18; –.04) | –.11* (–.18; –.03) | –.06 (–.13; .01)   |
|                                                    | Within <sup>1,4</sup>     | .03 (–.06; .13)    | .09 (–.01; .20)    | –.10* (–.19; –.02) | –.08 (–.17; .02)   | –.04 (–.13; .05)   |
|                                                    | Between <sup>1,5</sup>    | .14 (.01; .26)     | .14* (.02; .26)    | –.13* (–.25; –.01) | –.16* (–.28; –.04) | –.08 (–.21; .04)   |
| Vegetables<br>(g/day)                              | Adjusted <sup>1,2,3</sup> | .02 (–.05; .10)    | .04 (–.04; .12)    | –.01 (–.11; .09)   | –.07 (–.14; .01)   | .03 (–.04; .10)    |
|                                                    | Within <sup>1,4</sup>     | –.04 (–.13; .04)   | .02 (–.08; .11)    | .00 (–.08; .08)    | .00 (–.09; .09)    | .06 (–.02; .14)    |
|                                                    | Between <sup>1,5</sup>    | .17* (.05; .30)    | .08 (–.04; .20)    | –.11 (–.22; .01)   | –.18* (–.29; –.06) | –.04 (–.17; .08)   |
| Fruit (g/day)                                      | Adjusted <sup>1,2,3</sup> | .00 (–.07; .07)    | .05 (–.03; .13)    | –.03 (–.13; .06)   | –.08 (–.18; .02)   | .03 (–.05; .10)    |
|                                                    | Within <sup>1,4</sup>     | .00 (–.09; .10)    | .04 (–.07; .15)    | –.01 (–.09; .08)   | –.03 (–.13; .07)   | .00 (–.09; .09)    |
|                                                    | Between <sup>1,5</sup>    | .00 (–.12; .11)    | .06 (–.05; .17)    | –.02 (–.13; .08)   | –.09 (–.20; .02)   | .07 (–.05; .18)    |
| Legumes (g/day)                                    | Adjusted <sup>1,2</sup>   | .03 (–.02; .08)    | .04 (–.01; .10)    | –.04 (–.09; .01)   | –.04 (–.09; .02)   | –.02 (–.06; .03)   |
|                                                    | Within <sup>1,4</sup>     | .03 (–.02; .09)    | .04 (–.02; .11)    | –.04 (–.09; .01)   | –.04 (–.09; .02)   | –.02 (–.07; .04)   |
|                                                    | Between <sup>1,5</sup>    | .05 (–.10; .19)    | .04 (–.10; .18)    | –.05 (–.18; .08)   | –.03 (–.16; .11)   | .00 (–.15; .14)    |
| Whole grain<br>(g/day)                             | Adjusted <sup>1,2,3</sup> | .04 (–.04; .12)    | –.05 (–.14; .03)   | –.03 (–.10; .04)   | .06 (–.03; .15)    | –.04 (–.12; .04)   |
|                                                    | Within <sup>1,4</sup>     | .07 (–.03; .18)    | –.12* (–.24; .00)  | –.05 (–.14; .05)   | .08 (–.03; .19)    | –.03 (–.13; .08)   |
|                                                    | Between <sup>1,5</sup>    | .00 (–.11; .12)    | .01 (–.11; .12)    | –.02 (–.13; .09)   | .05 (–.06; .17)    | –.06 (–.18; .06)   |
| Nuts (g/day)                                       | Adjusted <sup>1,2,3</sup> | .10* (.04; .16)    | .04 (–.04; .13)    | –.10* (–.17; –.03) | –.09* (–.15; –.04) | –.05 (–.10; .00)   |
|                                                    | Within <sup>1,4</sup>     | .09* (.02; .16)    | .05 (–.03; .13)    | –.06 (–.12; .01)   | –.05 (–.12; .03)   | –.03 (–.09; .04)   |
|                                                    | Between <sup>1,5</sup>    | .11 (–.01; .24)    | .13* (.01; .25)    | –.10 (–.21; .02)   | –.13* (–.25; –.01) | –.05 (–.18; .07)   |
| Lean fish (g/day)                                  | Adjusted <sup>1,2,3</sup> | .04 (–.02; .10)    | –.01 (–.08; .06)   | .00 (–.06; .05)    | .01 (–.08; .10)    | .01 (–.06; .08)    |
|                                                    | Within <sup>1,4</sup>     | .03 (–.05; .10)    | .01 (–.07; .09)    | .01 (–.06; .08)    | .03 (–.05; .10)    | –.01 (–.07; .06)   |
|                                                    | Between <sup>1,5</sup>    | .09 (–.05; .22)    | –.05 (–.17; .08)   | –.05 (–.17; .07)   | .02 (–.11; .14)    | .06 (–.08; .19)    |
| Fatty fish (g/day)                                 | Adjusted <sup>1,2</sup>   | .05* (.00; .11)    | .06 (–.01; .13)    | –.04 (–.09; .01)   | –.03 (–.08; .03)   | –.01 (–.06; .04)   |
|                                                    | Within <sup>1,4</sup>     | .04 (–.02; .09)    | .05 (–.02; .11)    | –.01 (–.07; .04)   | –.03 (–.09; .03)   | .00 (–.06; .05)    |
|                                                    | Between <sup>1,5</sup>    | .15* (.01; .30)    | .00 (–.14; .14)    | –.18* (–.30; –.05) | –.04 (–.18; .09)   | –.10 (–.24; .04)   |
| Tea (g/day)                                        | Adjusted <sup>1,2,3</sup> | –.04 (–.13; .05)   | –.05 (–.14; .05)   | .01 (–.07; .10)    | .08 (–.04; .20)    | .03 (–.06; .12)    |
|                                                    | Within <sup>1,4</sup>     | –.10 (–.24; .04)   | –.11 (–.26; .05)   | .00 (–.13; .13)    | .11 (–.04; .25)    | –.02 (–.16; .11)   |
|                                                    | Between <sup>1,5</sup>    | –.01 (–.12; .11)   | –.02 (–.13; .10)   | .02 (–.09; .13)    | .07 (–.05; .18)    | .07 (–.04; .19)    |
| Alcohol (g/day)                                    | Adjusted <sup>1,2,3</sup> | .22* (.12; .31)    | .04 (–.06; .14)    | –.25* (–.40; –.11) | –.14* (–.27; –.01) | –.14* (–.25; –.04) |
|                                                    | Within <sup>1,4</sup>     | .14 (–.03; .30)    | .01 (–.18; .20)    | –.13 (–.29; .02)   | –.05 (–.23; .12)   | –.07 (–.23; .09)   |
|                                                    | Between <sup>1,5</sup>    | .25* (.14; .37)    | .05 (–.06; .16)    | –.09 (–.20; .02)   | –.12* (–.23; –.01) | –.15* (–.26; –.03) |
| Dairy (g/day)                                      | Adjusted <sup>1,2,3</sup> | –.02 (–.10; .05)   | .04 (–.04; .12)    | .01 (–.06; .08)    | –.04 (–.13; .05)   | –.04 (–.11; .03)   |
|                                                    | Within <sup>1,4</sup>     | .03 (–.07; .13)    | –.01 (–.12; .11)   | –.01 (–.11; .08)   | .03 (–.08; .14)    | –.06 (–.16; .04)   |
|                                                    | Between <sup>1,5</sup>    | –.09 (–.20; .02)   | .07 (–.03; .18)    | .04 (–.06; .14)    | –.05 (–.16; .05)   | –.02 (–.13; .09)   |
| Cheese (g/day)                                     | Adjusted <sup>1,2</sup>   | .09* (.02; .17)    | .01 (–.07; .09)    | –.06 (–.13; .02)   | –.06 (–.14; .01)   | –.04 (–.11; .04)   |
|                                                    | Within <sup>1,4</sup>     | .01 (–.07; .10)    | .03 (–.06; .13)    | –.04 (–.13; .04)   | –.06 (–.16; .03)   | –.01 (–.09; .08)   |
|                                                    | Between <sup>1,5</sup>    | .26* (.14; .39)    | –.02 (–.15; .10)   | –.04 (–.16; .07)   | –.06 (–.18; .07)   | –.10 (–.23; .02)   |
| Soft fats (g/day)                                  | Adjusted <sup>1,2,3</sup> | .02 (–.06; .09)    | –.01 (–.09; .07)   | –.02 (–.09; .04)   | –.02 (–.12; .08)   | –.04 (–.13; .06)   |
|                                                    | Within <sup>1,4</sup>     | .01 (–.09; .11)    | .07 (–.04; .18)    | –.05 (–.14; .04)   | –.10 (–.20; .00)   | –.07 (–.16; .02)   |
|                                                    | Between <sup>1,5</sup>    | .03 (–.08; .15)    | –.09 (–.19; .02)   | .01 (–.09; .11)    | .08 (–.03; .18)    | .03 (–.08; .14)    |
| Hard fats (g/day)                                  | Adjusted <sup>1,2</sup>   | –.07 (–.14; .01)   | –.02 (–.10; .06)   | .00 (–.06; .07)    | .00 (–.07; .08)    | .03 (–.04; .10)    |
|                                                    | Within <sup>1,4</sup>     | –.04 (–.13; .05)   | –.06 (–.16; .04)   | –.01 (–.10; .07)   | .01 (–.08; .11)    | .04 (–.05; .13)    |
|                                                    | Between <sup>1,5</sup>    | –.11 (–.23; .02)   | .03 (–.09; .15)    | .04 (–.07; .14)    | –.01 (–.13; .10)   | .01 (–.11; .13)    |
| Refined grain                                      | Adjusted <sup>1,2,3</sup> | .02 (–.04; .09)    | –.10* (–.18; –.03) | .05 (–.04; .13)    | .02 (–.05; .09)    | .03 (–.03; .10)    |
|                                                    | Within <sup>1,4</sup>     | .02 (–.06; .10)    | –.06 (–.15; .03)   | .07 (–.01; .14)    | –.01 (–.09; .08)   | .02 (–.05; .10)    |
|                                                    | Between <sup>1,5</sup>    | .04 (–.09; .17)    | –.10 (–.23; .02)   | .01 (–.11; .12)    | .05 (–.07; .17)    | .06 (–.07; .18)    |
| Red meat (g/day)                                   | Adjusted <sup>1,2,3</sup> | .05 (–.01; .11)    | –.04 (–.11; .02)   | .03 (–.04; .11)    | –.02 (–.08; .05)   | .03 (–.03; .09)    |
|                                                    | Within <sup>1,4</sup>     | .04 (–.03; .11)    | –.04 (–.12; .04)   | .05 (–.02; .11)    | .00 (–.07; .07)    | .06 (–.01; .13)    |
|                                                    | Between <sup>1,5</sup>    | .09 (–.05; .23)    | .00 (–.13; .14)    | –.05 (–.18; .07)   | –.06 (–.20; .07)   | –.08 (–.22; .06)   |
| Processed meat<br>(g/day)                          | Adjusted <sup>1,2,3</sup> | –.05 (–.14; .04)   | .01 (–.12; .13)    | .03 (–.04; .10)    | .09* (.01; .17)    | .05 (–.03; .13)    |
|                                                    | Within <sup>1,4</sup>     | –.01 (–.10; .08)   | –.01 (–.11; .09)   | .01 (–.07; .10)    | .04 (–.05; .13)    | .03 (–.05; .12)    |
|                                                    | Between <sup>1,5</sup>    | –.10 (–.24; .04)   | –.19* (–.32; –.06) | .07 (–.05; .20)    | .19* (.06; .32)    | .07 (–.07; .20)    |
|                                                    | Adjusted <sup>1,2,3</sup> | –.09* (–.16; –.03) | .05 (–.07; .18)    | .10 (.00; .20)     | .04 (–.03; .11)    | .07 (–.02; .16)    |
|                                                    | Within <sup>1,4</sup>     | –.06 (–.13; .02)   | .05 (–.04; .13)    | .09* (.02; .16)    | .03 (–.05; .11)    | .02 (–.05; .10)    |

|                                              |                        |                    |                  |                 |                 |                 |
|----------------------------------------------|------------------------|--------------------|------------------|-----------------|-----------------|-----------------|
| Sweetened beverages and fruit juices (g/day) | Between <sup>1,5</sup> | -.18* (-.30; -.06) | -.07 (-.18; .05) | .15* (.04; .25) | .06 (-.05; .17) | .19* (.07; .30) |
|----------------------------------------------|------------------------|--------------------|------------------|-----------------|-----------------|-----------------|

Abbreviations: DHD, Dutch Healthy Diet score; KA/QA, kynurenic-acid-to-quinolinic-acid ratio; HAA/HK, 3-hydroxyanthranilic-acid-to-3-hydroxykynurenine ratio; KTR, kynurenine-to-tryptophan ratio; and HKr, hydroxykynurenine ratio.

Both exposure and outcome variables are standardized.

Standard deviations of ratios are: 0.05 for KA/QA, 0.4 for HAA/HK; 10 for KTR; 0.2 for HKr; and 11 nmol/L for neopterin.

Standard deviations of dietary intake are: 15 points for DHD score; 71 g/day for vegetables; 90 g/day for fruit; 10 g/day for legumes; 63 g/day for whole grain; 7 g/day for nuts; 16 g/day for lean fish; 15 g/day for fatty fish; 264 g/day for tea; 19 g/day for alcohol; 143 g/day for dairy; 21 g/day for cheese; 14 g/day for soft fats; 12 g/day for hard fats; 51 g/day for refined grain; 27 g/day for red meat; 33 g/day for processed meat; and 115 g/day for sweetened beverages and fruit juices.

<sup>1</sup> Linear mixed models adjusted for age at enrollment (years), sex (male, female), renal function ( $\mu\text{mol/L}$ ), time since end treatment (weeks), chemotherapy (yes, no), comorbidities (0, 1,  $\geq 2$ ), stoma (yes, no), educational level (high, medium, low), BMI ( $\text{kg/m}^2$ ), total PA (hours/day), smoking status (current, former, never) and energy intake ( $\text{kcal/week}$ )

<sup>2</sup> The  $\beta$ -coefficients represent the overall longitudinal difference in kynurenine concentrations using linear mixed models, and can be interpreted as the amount of SD difference in kynurenine concentration/ratio according to 1SD difference in dietary score/intake

<sup>3</sup> A random slope was added to the model for vegetables with KTR; for fruit with KTR, HKr, and Neopt; for whole grain with KTR, and HKr; for nuts with KTR, HKr, HAA/HK, and Neopt; for lean fish with HKr, and Neopt; for fatty fish with HAA/HK; for tea with HKr; for alcohol with KTR, HKr, and Neopt; for dairy with HKr; for cheese with KTR; for soft fats with HKr, and Neopt; for refined grain with KTR, HKr, and HAA/HK; for red meat with KTR, and HAA/HK; for processed meat with HAA/HK, KA/QA, and Neopt; and for sweetened beverages and fruit juices with KTR, HAA/HK, and Neopt.

<sup>4</sup> The  $\beta$ -coefficients represent the change in kynurenine ratios over time within individuals using a hybrid model within linear mixed models

<sup>5</sup> The  $\beta$ -coefficients represent the difference in kynurenine ratios between individuals using a hybrid model within linear mixed models

\* Indicates a statistically significant association
